# Supplementary material for: Hydrologic Landscape Regionalisation Using Deductive Classification and Random Forests
Source: PLOS journal article supplement (doi:10.1371/journal.pone.0112856), 2014-11-14
Supplement: S7 (10.1371/journal.pone.0112856.s007) [file journal.pone.0112856.s007]

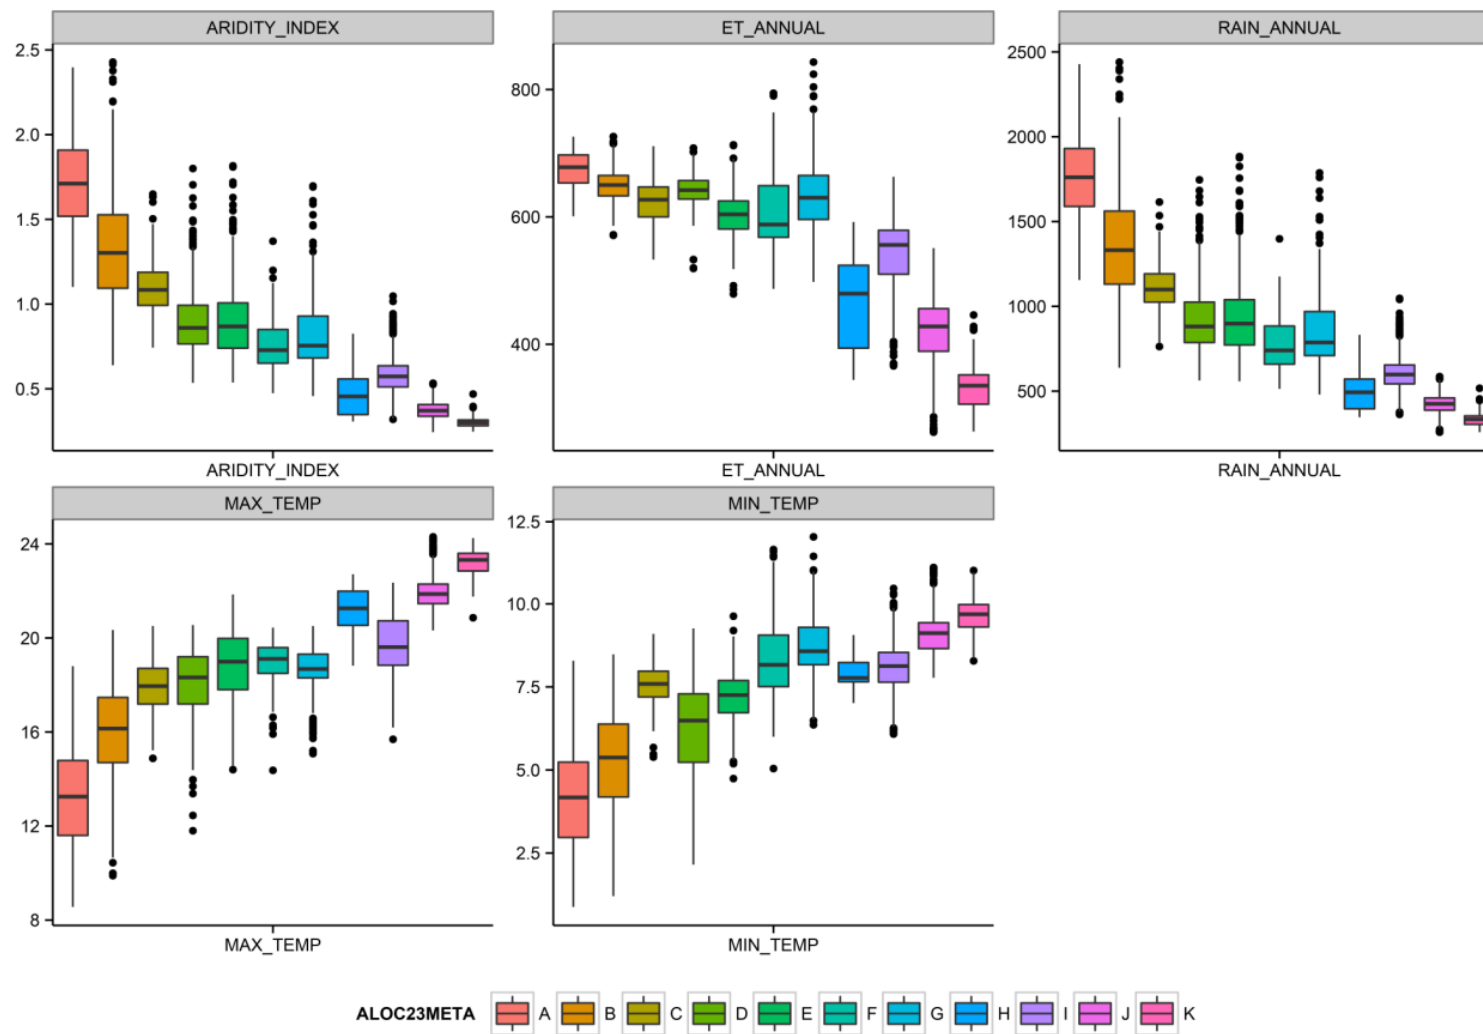

Figure S7: Climate variable distributions across each of the ALOC 23 meta-groups.
